# CORRECTION

## Correction: Using Qualitative Evidence in Decision Making for Health and Social Interventions: An Approach to Assess Confidence in Findings from Qualitative Evidence Syntheses (GRADE-CERQual)

The *PLOS Medicine* Staff

### Notice of Republication

This article was republished on May 18, 2016, to fix an issue with broken supporting information hyperlinks that was introduced during the typesetting process. The publisher apologizes for the errors. Please download this article again to view the correct version. The originally published, uncorrected article and the republished, corrected articles are provided here for reference.

### Supporting Information

**S1 File. Originally published, uncorrected article.**  
(PDF)

**S2 File. Republished, corrected article.**  
(PDF)

### Reference

1. Lewin S, Glenton C, Munthe-Kaas H, Carlsen B, Colvin CJ, Gülmezoglu M, et al. (2015) Using Qualitative Evidence in Decision Making for Health and Social Interventions: An Approach to Assess Confidence in Findings from Qualitative Evidence Syntheses (GRADE-CERQual). *PLoS Med* 12(10): e1001895. doi: [10.1371/journal.pmed.1001895](https://doi.org/10.1371/journal.pmed.1001895) PMID: [26506244](https://pubmed.ncbi.nlm.nih.gov/26506244/)

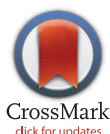

### OPEN ACCESS

**Citation:** The *PLOS Medicine* Staff (2016) Correction: Using Qualitative Evidence in Decision Making for Health and Social Interventions: An Approach to Assess Confidence in Findings from Qualitative Evidence Syntheses (GRADE-CERQual). *PLoS Med* 13(6): e1002065. doi:10.1371/journal.pmed.1002065

**Published:** June 10, 2016

**Copyright:** © 2016 The PLOS Medicine Staff. This is an open access article distributed under the terms of the [Creative Commons Attribution License](https://creativecommons.org/licenses/by/4.0/), which permits unrestricted use, distribution, and reproduction in any medium, provided the original author and source are credited.
